# Supplementary material for: Cold Atmospheric Plasma Stimulates Clathrin-Dependent Endocytosis to Repair Oxidised Membrane and Enhance Uptake of Nanomaterial in Glioblastoma Multiforme Cells
Source: PubMed Central journal article supplement (PMC7181794; doi:10.1038/s41598-020-63732-y), 2020-04-24
Supplement: 41598_2020_63732_MOESM1_ESM.pdf [file 41598_2020_63732_MOESM1_ESM.pdf]

## **TITLE:**

### ***Supplementary Information:***

## **Cold Atmospheric Plasma Stimulates Clathrin-Dependent Endocytosis to Repair Oxidised Membrane and Enhance Uptake of Nanomaterial in Glioblastoma Multiforme Cells**

Zhonglei He<sup>1,2,3</sup>, Kangze Liu<sup>1,2,3\*</sup>, Laurence Scally<sup>1\*</sup>, Eline Manaloto<sup>1,2</sup>, Sebnem Gunes<sup>1,2</sup>, Sing Wei Ng<sup>1,3</sup>, Marcus Maher<sup>2</sup>, Brijesh Tiwari<sup>4</sup>, Hugh J Byrne<sup>2</sup>, Paula Bourke<sup>1,3,5</sup>, Furong Tian<sup>1,2,3</sup>, Patrick J Cullen<sup>1,6</sup>, and James F Curtin<sup>1,2,3</sup>

<sup>1</sup>BioPlasma Research Group, School of Food Science and Environmental Health, Technological University Dublin, Dublin, Ireland; <sup>2</sup>Nanolab, FOCAS Research Institute, Technological University Dublin, Dublin, Ireland; and <sup>3</sup>Environmental, Sustainability and Health Research Institutes, Technological University Dublin, Dublin, Ireland; <sup>4</sup>Department of Food Biosciences, Teagasc Food Research Centre, Ashtown, Dublin, Ireland; <sup>5</sup>School of Biological Sciences, IGFS, Queens University Belfast, United Kingdom; <sup>6</sup>School of Chemical and Biomolecular Engineering, University of Sydney, Australia

\*These authors contributed equally to this work.

### **Corresponding author**

Correspondence to James Curtin (james.curtin@dit.ie).

## Supplementary Materials

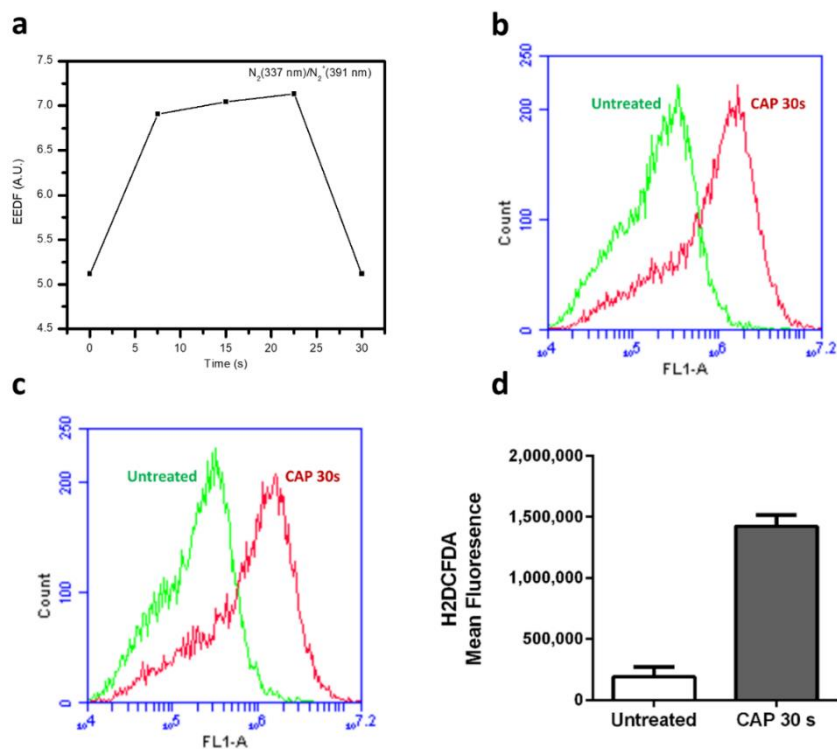

**Supplementary Figure S1.** (a) Electro energy distribution function (EEDF) of CAP; Fluorescence level of intracellular oxidised H<sub>2</sub>DCFDA was measured via Flow cytometry, two replicas (b, c) and the analysed average of mean FL1-A value (d).

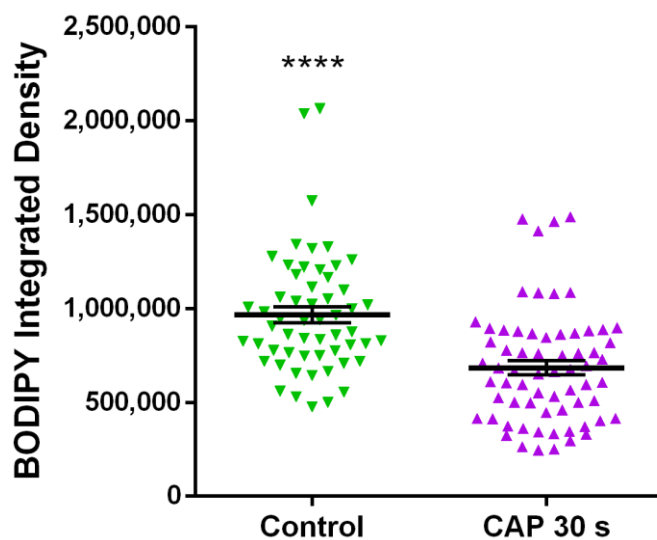

**Supplementary Figure S2.** The fluorescent integrated density of non-oxidised BODIPY was quantified using ImageJ. The statistical significance was assessed by one-way ANOVA with Tukey's multiple comparison post-test (\* $P < 0.05$ , \*\* $P < 0.01$ , \*\*\* $P < 0.001$ , \*\*\*\* $p < 0.0001$ ),  $n \geq 50$ , see Supplementary Table S2 for original data

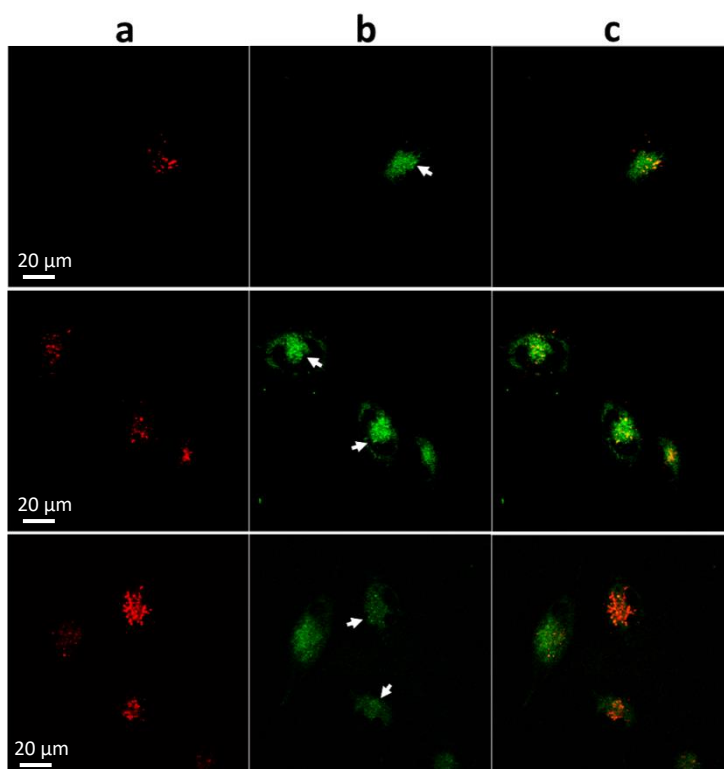

**Supplementary Figure S3.** The U373MG cells were loaded with C11-BODIPY (green), then co-stained with and LysoTracker™ Deep Red (red) after CAP treatment (30 s, 75 kV) and observed under confocal microscope, three images are presented in the figure. White arrows point out examples of co-localisation between oxidised C11-BODIPY and lysosomes.

#### Supplementary Table S1:

The intensity of O<sub>3</sub> production may explain why there was no detectable emission of NO, O, NO<sub>x</sub> and low intensities of <sup>•</sup>OH and N<sub>2</sub><sup>+</sup> in Figure 2a, as the free electrons were likely quenched before reaching higher energetic states by the interaction and formation of O<sub>3</sub>. Reaction mechanisms (1-4) can further explain how the formation of NO, NO<sub>x</sub>, and O was hindered. In these reactions, M is a third body atom or molecule that, in this case, may be N<sub>2</sub><sup>\*</sup> or O<sub>2</sub>.

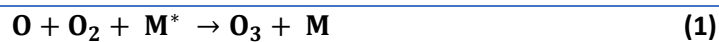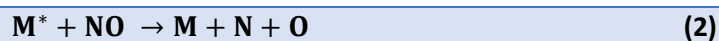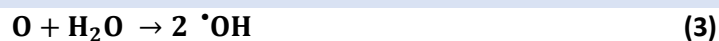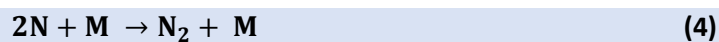

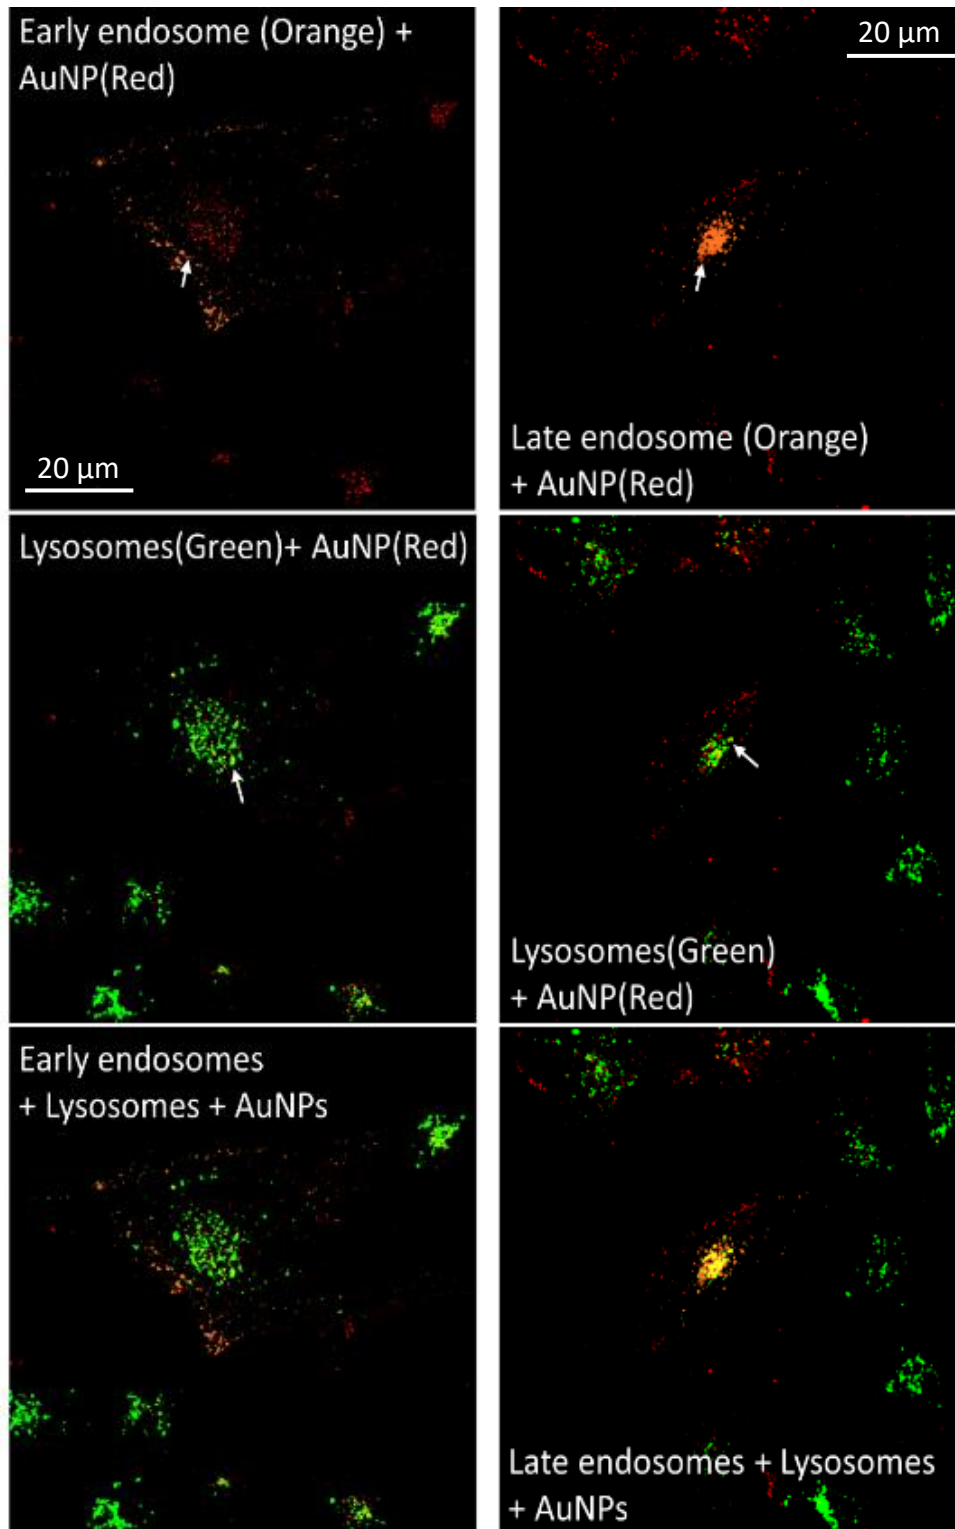

**Supplementary Figure S4. Uptake and subcellular localization of AuNPs observed by confocal microscopy.** After CAP treatment (0, 30 s), U373MG cells were incubated with 100 μg/ml AuNPs for 3 h. Early, late endosomes and lysosomes were stained using CellLight™ Early/Late Endosomes-RFP (Marked as orange channel in images) and LysoTracker™ Green DND-26, respectively. The far-red emission of AuNPs (Red) was excited using 633 nm laser.

**Supplementary Table S2.**

| <b>Integrated Density of BODIPY</b> |                              |                          |                          |
|-------------------------------------|------------------------------|--------------------------|--------------------------|
| <b>Control. Non-oxidised</b>        | <b>CAP 30s. Non-oxidised</b> | <b>Control. Oxidised</b> | <b>CAP 30s. Oxidised</b> |
| 825441                              | 764257                       | 232430                   | 417629                   |
| 998949                              | 760580                       | 310618                   | 342874                   |
| 1060462                             | 665879                       | 327636                   | 495228                   |
| 859260                              | 1089862                      | 179182                   | 477016                   |
| 530275                              | 765581                       | 307326                   | 426428                   |
| 829356                              | 360915                       | 176954                   | 448261                   |
| 665668                              | 551518                       | 499637                   | 293395                   |
| 1278050                             | 264406                       | 510195                   | 325466                   |
| 2038367                             | 596517                       | 356545                   | 273752                   |
| 936308                              | 760052                       | 292490                   | 464481                   |
| 1259645                             | 332197                       | 407417                   | 167146                   |
| 1573896                             | 866259                       | 281113                   | 394278                   |
| 1019896                             | 499450                       | 227051                   | 302926                   |
| 963641                              | 296252                       | 181733                   | 221856                   |
| 862036                              | 846493                       | 189916                   | 454239                   |
| 812204                              | 881837                       | 248568                   | 374735                   |
| 1113481                             | 861837                       | 300329                   | 373363                   |
| 748271                              | 778087                       | 273441                   | 505987                   |
| 1165023                             | 524382                       | 211968                   | 292939                   |
| 764072                              | 867958                       | 282522                   | 388750                   |
| 1232175                             | 508610                       | 317893                   | 597744                   |
| 1007005                             | 595270                       | 161873                   | 295272                   |
| 982070                              | 610424                       | 155628                   | 306654                   |
| 1320705                             | 445595                       | 458594                   | 390399                   |
| 946150                              | 1463426                      | 399135                   | 890896                   |
| 1342500                             | 708723                       | 462811                   | 741382                   |
| 653886                              | 888079                       | 196388                   | 524934                   |
| 499775                              | 373856                       | 190853                   | 306468                   |
| 875556                              | 1477152                      | 153302                   | 390161                   |
| 1037540                             | 653049                       | 163432                   | 651081                   |
| 906223                              | 1078557                      | 142877                   | 187065                   |
| 1097569                             | 675892                       | 206789                   | 906811                   |
| 1207059                             | 402444                       | 37404                    | 312273                   |
| 718964                              | 1083730                      | 109317                   | 617780                   |
| 559771                              | 930197                       | 236604                   | 468648                   |
| 475472                              | 898191                       | 142135                   | 296259                   |
| 747381                              | 331716                       | 270552                   | 389688                   |
| 807312                              | 532198                       | 82436                    | 195602                   |
| 707968                              | 817839                       | 84652                    | 506283                   |
| 840742                              | 414865                       | 168778                   | 451699                   |
| 777642                              | 749632                       | 364207                   | 303635                   |
| 1022745                             | 879071                       | 100734                   | 431292                   |
| 1228769                             | 1084756                      | 114519                   | 701205                   |
| 2064986                             | 412708                       | 49002                    | 444981                   |
| 697882                              | 884861                       | 273032                   | 223330                   |
| 1220345                             | 566726                       | 58729                    | 423576                   |
| 775782                              | 667011                       | 169249                   | 569403                   |
| 1182171                             | 895365                       | 184585                   | 660069                   |
| 812884                              | 497905                       | 198073                   | 227918                   |
| 940440                              | 603690                       | 154684                   | 478087                   |
| 555395                              | 684168                       | 441372                   | 254274                   |
| 1327438                             | 371186                       | 274210                   | 362961                   |
| 718786                              | 502118                       | 245082                   | 398478                   |
| 642920                              | 415450                       | 228162                   | 325251                   |
| 1050097                             | 1489285                      | 437520                   | 346672                   |

|                                                         |         |                          |         |
|---------------------------------------------------------|---------|--------------------------|---------|
| 834466                                                  | 250668  | 350830                   | 479690  |
|                                                         | 247114  | 199513                   | 1122291 |
|                                                         | 460969  | 184087                   | 191401  |
|                                                         | 345379  | 260743                   | 335414  |
|                                                         | 325823  | 234688                   | 346672  |
|                                                         | 342280  |                          | 303883  |
|                                                         | 694899  |                          | 306629  |
|                                                         | 607436  |                          | 1149608 |
|                                                         | 821919  |                          | 150280  |
|                                                         | 1413574 |                          | 456893  |
|                                                         | 729336  |                          | 283002  |
|                                                         |         |                          | 269830  |
|                                                         |         |                          | 234559  |
|                                                         |         |                          | 524097  |
|                                                         |         |                          | 372300  |
|                                                         |         |                          | 626520  |
|                                                         |         |                          | 889340  |
|                                                         |         |                          | 691489  |
| <b>Integrated Density of BODIPY with High Threshold</b> |         |                          |         |
| <b>Control. Oxidised</b>                                |         | <b>CAP 30s. Oxidised</b> |         |
| 19018                                                   |         | 34784                    |         |
| 4765                                                    |         | 40598                    |         |
| 16250                                                   |         | 46050                    |         |
| 7714                                                    |         | 59301                    |         |
| 4375                                                    |         | 47707                    |         |
| 88177                                                   |         | 31247                    |         |
| 13826                                                   |         | 285541                   |         |
| 13985                                                   |         | 136701                   |         |
| 20766                                                   |         | 119089                   |         |
| 44683                                                   |         | 190134                   |         |
| 21404                                                   |         | 40796                    |         |
| 38923                                                   |         | 81647                    |         |
| 134601                                                  |         | 308360                   |         |
| 49402                                                   |         | 134591                   |         |
| 133104                                                  |         | 106744                   |         |
| 19026                                                   |         | 78642                    |         |
| 6092                                                    |         | 136430                   |         |
| 8353                                                    |         | 169067                   |         |
| 29580                                                   |         | 217020                   |         |
| 17094                                                   |         | 37454                    |         |
| 35776                                                   |         | 24779                    |         |
| 13745                                                   |         | 52852                    |         |
| 76947                                                   |         | 29677                    |         |
| 1924                                                    |         | 81249                    |         |
| 13232                                                   |         | 117778                   |         |
| 12490                                                   |         | 68022                    |         |
| 45683                                                   |         | 190817                   |         |
| 50730                                                   |         | 88448                    |         |
| 25208                                                   |         | 164970                   |         |
| 12313                                                   |         | 118069                   |         |

|       |        |
|-------|--------|
| 11361 | 44102  |
| 6732  | 98463  |
| 7489  | 51073  |
| 28732 | 241221 |
| 70660 | 30053  |
| 12378 | 101954 |
| 14617 | 68583  |
| 22167 | 60325  |
| 14598 | 198866 |
| 35108 | 77078  |
| 55412 | 177196 |
| 34319 | 105262 |
| 67507 | 68627  |
| 11005 | 99365  |
| 37081 | 86536  |
| 41038 | 145387 |
| 18167 | 118557 |
| 19262 | 93622  |
| 35329 | 109825 |
| 14752 | 80553  |
| 25135 | 21300  |
| 41692 | 97853  |
| 9707  | 71932  |
| 15904 | 42466  |
| 8189  | 120579 |
|       | 71679  |
|       | 136028 |
|       | 59030  |
|       | 32224  |
|       | 43704  |
|       | 81999  |
|       | 81288  |
|       | 78779  |
|       | 54076  |
|       | 95249  |
|       | 42523  |
|       | 65630  |
|       | 242304 |
|       | 142045 |
|       | 59181  |
|       | 66497  |
|       | 278031 |
|       | 118417 |
|       | 119211 |
|       | 78988  |
|       | 98313  |

|  |       |
|--|-------|
|  | 62779 |
|  | 72525 |
|  | 96661 |

**Supplementary Table S3.**

| <b>Integrated Density of Transferrin</b> |               |
|------------------------------------------|---------------|
| <b>Untreated</b>                         | <b>CAP30s</b> |
| 110807                                   | 57027         |
| 66999                                    | 112562        |
| 125539                                   | 86679         |
| 25907                                    | 97764         |
| 18663                                    | 210017        |
| 36431                                    | 151799        |
| 55003                                    | 82789         |
| 58136                                    | 180386        |
| 108838                                   | 219322        |
| 203364                                   | 120825        |
| 38237                                    | 109507        |
| 106023                                   | 181812        |
| 153065                                   | 232475        |
| 46973                                    | 103867        |
| 231021                                   | 165690        |
| 126260                                   | 189547        |
| 58261                                    | 145942        |
| 53516                                    | 216243        |
| 28616                                    | 175271        |
| 169818                                   | 79758         |
| 119425                                   | 197285        |
| 69592                                    | 173238        |
| 24623                                    | 207385        |
| 126382                                   | 137586        |
| 109035                                   | 103140        |
| 251395                                   | 55164         |
| 90739                                    | 287846        |
| 76501                                    | 49045         |
| 76803                                    | 75313         |
| 71061                                    | 76832         |
| 70167                                    | 89317         |
| 71700                                    | 116572        |
| 29972                                    | 81825         |
| 28606                                    | 205643        |
| 87132                                    | 134411        |
| 33269                                    | 101051        |
| 95125                                    | 355132        |
| 80060                                    | 57270         |
| 64769                                    | 73021         |
| 106737                                   | 108349        |
| 74147                                    | 88346         |
| 79054                                    | 56330         |
| 25151                                    | 115220        |
| 40603                                    | 109490        |
| 72073                                    | 124859        |
| 124198                                   | 218535        |
| 77852                                    | 134532        |
| 103302                                   | 71167         |
| 109488                                   | 71050         |
| 58064                                    | 60830         |



|        |        |
|--------|--------|
| 75705  | 58081  |
| 27911  | 63689  |
| 86282  | 181942 |
| 117192 | 170011 |
| 32705  | 89790  |
| 120661 | 71784  |
| 129909 | 163049 |
| 106761 | 107358 |
| 90118  | 132343 |
| 39569  |        |
| 164849 |        |
| 84330  |        |

**Supplementary Table S4**

| Integrated Density of Transferrin |        |         |             |        |         |
|-----------------------------------|--------|---------|-------------|--------|---------|
| Untreated                         | CAP30s | Pitstop | Pitstop+CAP | CPZ    | CPZ+CAP |
| 108598                            | 295322 | 64736   | 100433      | 38802  | 56788   |
| 43443                             | 108782 | 38572   | 31750       | 24310  | 83128   |
| 77433                             | 251156 | 47517   | 76352       | 39598  | 45220   |
| 94477                             | 84583  | 25591   | 100240      | 294486 | 19690   |
| 86584                             | 65841  | 35782   | 71304       | 68324  | 13416   |
| 98793                             | 91549  | 39735   | 28401       | 51158  | 9444    |
| 102070                            | 163102 | 100772  | 44936       | 53180  | 16446   |
| 129770                            | 156221 | 40368   | 22378       | 72708  | 29576   |
| 112724                            | 81989  | 30864   | 12836       | 68844  | 5404    |
| 60643                             | 207294 | 74733   | 17119       | 131656 | 7596    |
| 70525                             | 80463  | 76017   | 26816       | 72856  | 4568    |
| 110091                            | 86986  | 75272   | 97123       | 62814  | 21856   |
| 139093                            | 145578 | 91199   | 43380       | 119252 | 2280    |
| 98220                             | 63260  | 29856   | 83012       | 26884  | 7814    |
| 133442                            | 69745  | 115762  | 17713       | 51452  | 129394  |
| 143649                            | 110816 | 105188  | 49522       | 28458  | 117634  |
| 75022                             | 123363 | 43457   | 54983       | 71198  | 30926   |
| 123196                            | 134115 | 50026   | 18278       | 74608  | 77612   |
| 70338                             | 228112 | 7877    | 59622       | 26936  | 68470   |
| 55592                             | 140503 | 69660   | 29797       | 3384   | 88596   |
| 71972                             | 121850 | 99571   | 77787       | 7454   | 30684   |
| 168227                            | 158303 | 62211   | 74743       | 34034  | 75958   |
| 93020                             | 121401 | 89301   | 78765       | 19250  | 95484   |
| 129316                            | 70365  | 98921   | 47823       | 15276  | 103746  |
| 110653                            | 146501 | 86540   | 32383       | 49392  | 9158    |
| 88591                             | 129369 | 84316   | 42288       | 15354  | 4520    |
| 122648                            | 82011  | 80932   | 52147       | 19722  | 25244   |
| 75639                             | 98961  | 76763   | 42159       | 51914  | 17308   |
| 131539                            | 112977 | 188739  | 101745      | 54704  | 50974   |
| 157044                            | 76354  | 30436   | 28371       | 41096  | 16284   |
| 163738                            | 94709  | 46748   | 63526       | 36212  | 5584    |
| 78925                             | 51942  | 34317   | 91475       | 23016  | 19136   |
| 111987                            | 177314 | 59776   | 41096       | 19956  | 7634    |
| 125506                            | 94675  | 35976   | 56949       | 17996  | 30856   |
| 125495                            | 129185 | 57772   | 69132       | 31342  | 84574   |
| 120301                            | 127507 | 56559   | 99148       | 19040  | 30892   |
| 105738                            | 90869  | 90776   | 41119       | 56680  | 9672    |
| 48458                             | 119518 | 32429   | 59855       | 24088  | 12082   |
| 68317                             | 113258 | 58616   | 47787       | 42838  | 37932   |
| 36999                             | 247984 | 18765   | 73103       | 18410  | 4872    |
| 72117                             | 277862 | 67164   | 27352       | 9752   | 61354   |
| 89229                             | 184301 | 72684   | 37608       | 22664  | 29434   |
| 45164                             | 167793 | 38795   | 41806       | 21144  | 36554   |



| Integrated Density of Transferrin |          |         |              |           |                |           |                |
|-----------------------------------|----------|---------|--------------|-----------|----------------|-----------|----------------|
| MβCD                              | MβCD+CAP | Filipin | Filipin +CAP | Genistein | Genistein +CAP | Amiloride | Amiloride +CAP |
| 131419                            | 66932    | 97900   | 163871       | 101792    | 133841         | 196235    | 124569         |
| 124614                            | 93007    | 129504  | 187302       | 133971    | 118480         | 138704    | 135077         |
| 69503                             | 97275    | 110897  | 280194       | 65462     | 127431         | 29079     | 51297          |
| 75277                             | 46598    | 90356   | 105230       | 147728    | 283770         | 72203     | 88474          |
| 76750                             | 77640    | 104776  | 76422        | 147365    | 103548         | 64304     | 112269         |
| 18178                             | 92103    | 73574   | 85766        | 68864     | 51402          | 72146     | 45995          |
| 81444                             | 24984    | 159303  | 113291       | 72395     | 55713          | 83737     | 14594          |
| 88041                             | 95210    | 124298  | 90004        | 101640    | 94243          | 54808     | 47209          |
| 57794                             | 98855    | 108271  | 232008       | 96453     | 244560         | 33708     | 144728         |
| 51151                             | 89031    | 72235   | 76414        | 174993    | 104571         | 31934     | 49935          |
| 76552                             | 75078    | 33351   | 137916       | 271282    | 93475          | 64961     | 123415         |
| 86342                             | 85701    | 30163   | 116268       | 221595    | 142366         | 56665     | 114787         |
| 40633                             | 59098    | 62316   | 77831        | 83503     | 113373         | 48094     | 163106         |
| 97243                             | 91913    | 65030   | 77608        | 145251    | 94037          | 30674     | 99006          |
| 36007                             | 93666    | 109848  | 134224       | 99669     | 83792          | 97877     | 104122         |
| 79613                             | 93835    | 95871   | 82976        | 72559     | 161527         | 99403     | 145760         |
| 79863                             | 73324    | 106984  | 164104       | 202898    | 247658         | 60424     | 131902         |
| 115776                            | 69286    | 157208  | 74697        | 51052     | 82664          | 76203     | 117916         |
| 47129                             | 35314    | 109433  | 78977        | 58917     | 65763          | 37386     | 43884          |
| 36055                             | 46718    | 27594   | 83753        | 112259    | 87005          | 81334     | 139639         |
| 87390                             | 83701    | 79618   | 146374       | 140919    | 179148         | 29538     | 137618         |
| 62452                             | 56757    | 89721   | 152046       | 163308    | 75257          | 65159     | 73523          |
| 93547                             | 68512    | 194085  | 135891       | 67768     | 260961         | 79248     | 115470         |
| 74815                             | 43701    | 36909   | 127681       | 69400     | 94462          | 34570     | 38530          |
| 65652                             | 38500    | 50967   | 92144        | 52293     | 252478         | 101412    | 214459         |
| 90255                             | 46948    | 159055  | 91692        | 74286     | 71411          | 40862     | 55017          |
| 71303                             | 102306   | 165479  | 64158        | 119649    | 159244         | 30034     | 72765          |
| 50020                             | 90653    | 48369   | 143926       | 121836    | 167913         | 78864     | 82769          |
| 76361                             | 105447   | 39814   | 83297        | 157275    | 103238         | 21499     | 145664         |
| 61373                             | 48421    | 82143   | 93936        | 100709    | 117632         | 87521     | 103887         |
| 72042                             | 14139    | 117174  | 100813       | 268448    | 56085          | 32872     | 96235          |
| 89546                             | 27184    | 96452   | 101386       | 96458     | 122851         | 86774     | 107471         |
| 94135                             | 58249    | 61675   | 144732       | 200374    | 244874         | 108724    | 73740          |
| 70875                             | 29039    | 152249  | 50729        | 133156    | 172584         | 99005     | 138795         |
| 46285                             | 118411   | 51630   | 72558        | 123251    | 93479          | 91400     | 109758         |
| 74820                             | 60569    | 178335  | 116879       | 66756     | 99088          | 162496    | 97441          |
| 64908                             | 69129    | 58091   | 92915        | 148409    | 156027         | 59966     | 55005          |
| 49964                             | 19395    | 109739  | 150147       | 156027    | 139595         | 83504     | 122417         |
| 25266                             | 97511    | 122864  | 126267       | 116189    | 127740         | 79816     | 96430          |
| 12030                             | 99651    | 62501   | 88480        | 131616    | 188948         | 70233     | 105109         |
| 68275                             | 94682    | 115067  | 70907        | 145548    | 247489         | 54977     | 82412          |
| 24230                             | 53849    | 89403   | 87317        | 64925     | 129827         | 20755     | 137153         |
| 48315                             | 77480    | 144868  | 91462        | 99657     | 129957         | 87959     | 62907          |
| 56293                             | 124595   | 133432  | 158029       | 129320    | 108170         | 113851    | 62485          |
| 46775                             | 125449   | 143229  |              | 126041    | 113664         | 9751      | 139596         |

|                                    |                |                |                    |            |                |        |  |
|------------------------------------|----------------|----------------|--------------------|------------|----------------|--------|--|
| 53149                              | 67036          | 50177          |                    | 113392     | 224130         | 195704 |  |
| 61754                              | 101836         | 60733          |                    | 69885      | 249655         | 205460 |  |
| 18804                              | 127051         | 147230         |                    | 81771      | 112130         | 71758  |  |
| 23564                              | 78954          | 74873          |                    | 256252     | 137488         | 60650  |  |
| 46598                              | 56597          | 64963          |                    | 185763     | 246213         | 102646 |  |
|                                    |                | 173794         |                    | 90235      | 99266          | 104360 |  |
|                                    |                |                |                    | 87308      | 88875          | 72262  |  |
|                                    |                |                |                    | 34485      | 121148         | 62646  |  |
|                                    |                |                |                    | 64651      | 215831         | 106858 |  |
|                                    |                |                |                    | 116152     |                |        |  |
|                                    |                |                |                    | 160153     |                |        |  |
| <b>Integrated Density of AuNPs</b> |                |                |                    |            |                |        |  |
| <b>Untreated</b>                   | <b>CAP 30s</b> | <b>Pitstop</b> | <b>Pitstop+CAP</b> | <b>CPZ</b> | <b>CPZ+CAP</b> |        |  |
| 5516                               | 22261          | 6083           | 3792               | 7990       | 8366           |        |  |
| 3581                               | 12306          | 4177           | 6099               | 1863       | 1957           |        |  |
| 27847                              | 10762          | 1746           | 2099               | 1486       | 8966           |        |  |
| 15965                              | 3480           | 3011           | 1812               | 1434       | 6266           |        |  |
| 2647                               | 10667          | 4032           | 1975               | 5801       | 1452           |        |  |
| 3198                               | 4966           | 4808           | 6106               | 4778       | 3468           |        |  |
| 6305                               | 8758           | 3805           | 2532               | 7212       | 2421           |        |  |
| 5788                               | 20948          | 7747           | 1728               | 5556       | 2566           |        |  |
| 3919                               | 8903           | 7417           | 3160               | 5631       | 3101           |        |  |
| 17942                              | 10360          | 1322           | 3273               | 4089       | 4259           |        |  |
| 4457                               | 17401          | 2229           | 2863               | 2949       | 2871           |        |  |
| 18099                              | 50518          | 4509           | 4671               | 4297       | 3558           |        |  |
| 5395                               | 21642          | 5231           | 5348               | 2607       | 3562           |        |  |
| 10992                              | 9222           | 2962           | 2937               | 5111       | 7809           |        |  |
| 16843                              | 11587          | 2971           | 4733               | 2967       | 7133           |        |  |
| 7621                               | 14788          | 2567           | 3325               | 8772       | 4191           |        |  |
| 17892                              | 13311          | 6843           | 5923               | 5787       | 3747           |        |  |
| 21501                              | 20808          | 1608           | 7813               | 5110       | 8074           |        |  |
| 2455                               | 12197          | 10176          | 2810               | 3289       | 5436           |        |  |
| 8796                               | 8593           | 6170           | 2574               | 2880       | 3060           |        |  |
| 11688                              | 10932          | 1970           | 9692               | 7444       | 2601           |        |  |
| 3500                               | 15539          | 3286           | 2373               | 9698       | 3402           |        |  |
| 13317                              | 20754          | 8646           | 4150               | 3923       | 3123           |        |  |
| 4841                               | 8846           | 2766           | 8823               | 5399       | 2857           |        |  |
| 2679                               | 4831           | 1331           | 4191               | 2188       | 5444           |        |  |
| 17626                              | 16624          | 5692           | 1857               | 5285       | 6896           |        |  |
| 1669                               | 10846          | 4185           | 3482               | 4443       | 3207           |        |  |
| 8186                               | 16627          | 5613           | 4884               | 4856       | 4577           |        |  |
| 9202                               | 19013          | 6779           | 10185              | 3336       | 3296           |        |  |
| 9836                               | 18567          | 5571           | 4395               | 7300       | 3899           |        |  |
| 8877                               | 12700          | 3958           | 2648               | 2034       | 3728           |        |  |
| 10929                              | 10548          | 3951           | 1977               | 2889       | 2222           |        |  |
| 8565                               | 6980           | 2132           | 4485               | 5657       | 3424           |        |  |
| 7736                               | 12991          | 2702           | 5126               | 3539       | 6041           |        |  |
| 2356                               | 15723          | 1284           | 4665               | 3242       | 3298           |        |  |
| 2851                               | 29901          | 2677           | 5481               | 7771       | 8405           |        |  |
| 23594                              | 7900           | 5960           | 2430               | 3372       | 4964           |        |  |
| 14115                              | 24781          | 4984           | 4714               |            | 4473           |        |  |
| 5866                               | 12827          | 7586           | 3752               |            | 1527           |        |  |
| 25137                              | 11509          | 4864           | 4573               |            | 3776           |        |  |
| 11108                              | 31897          | 9875           | 1779               |            | 4807           |        |  |
| 9864                               | 4429           | 5750           | 2711               |            | 2822           |        |  |
| 16203                              | 5919           | 6359           | 4560               |            | 4205           |        |  |
| 11111                              | 7653           | 6231           | 3132               |            | 3023           |        |  |
| 9532                               | 14639          | 4619           | 1628               |            | 10408          |        |  |

|       |       |       |       |  |  |
|-------|-------|-------|-------|--|--|
| 8395  | 13590 | 1388  | 6677  |  |  |
| 11415 | 8222  | 4931  | 12145 |  |  |
| 11279 | 15100 | 2072  | 22026 |  |  |
| 11099 | 26498 | 3939  | 5527  |  |  |
| 13153 | 14704 | 3847  | 2204  |  |  |
| 12553 | 5136  | 2878  | 2964  |  |  |
| 13217 | 17050 | 5958  | 3948  |  |  |
| 17633 | 9468  | 6171  | 7410  |  |  |
| 4742  | 7312  | 9188  | 2197  |  |  |
| 11052 | 4848  | 3643  | 1465  |  |  |
| 15608 | 13345 | 1471  | 5365  |  |  |
| 5281  | 10442 | 8934  | 4764  |  |  |
| 15270 | 17738 | 7551  | 1713  |  |  |
| 12153 | 10179 | 2156  | 2552  |  |  |
| 14067 | 7909  | 9601  | 2816  |  |  |
| 13005 | 12894 | 15586 | 1916  |  |  |
| 6557  | 10555 | 7303  | 6227  |  |  |
| 14369 | 29626 | 3134  | 7636  |  |  |
| 28194 | 9385  | 3070  | 16947 |  |  |
| 4478  | 13564 | 6450  | 2184  |  |  |
| 7769  | 26029 | 4504  | 5572  |  |  |
| 15100 | 18355 | 1676  | 2971  |  |  |
| 14411 | 8849  |       | 4198  |  |  |
| 5912  | 6822  |       | 3081  |  |  |
| 9159  | 10362 |       | 8244  |  |  |
| 10064 | 12428 |       | 6451  |  |  |
| 22400 | 9474  |       | 2825  |  |  |
| 15100 |       |       | 733   |  |  |
| 3145  |       |       |       |  |  |
| 5178  |       |       |       |  |  |
| 16426 |       |       |       |  |  |
| 27029 |       |       |       |  |  |
| 8473  |       |       |       |  |  |
| 6730  |       |       |       |  |  |
| 4345  |       |       |       |  |  |
| 9773  |       |       |       |  |  |

**Integrated Density of AuNPs**

| <b>Filipin</b> | <b>Filipin +CAP</b> | <b>Genistein</b> | <b>Genistein +CAP</b> | <b>MβCD</b> | <b>MβCD +CAP</b> | <b>Amiloride</b> | <b>Amiloride +CAP</b> |
|----------------|---------------------|------------------|-----------------------|-------------|------------------|------------------|-----------------------|
| 14925          | 45932               | 7861             | 8525                  | 10364       | 5563             | 4919             | 12384                 |
| 13177          | 6400                | 3124             | 8659                  | 3826        | 6803             | 6343             | 8314                  |
| 6253           | 6224                | 7004             | 17234                 | 5294        | 2748             | 8187             | 5489                  |
| 4841           | 21801               | 8737             | 11437                 | 8912        | 3850             | 3139             | 4808                  |
| 17947          | 15017               | 12423            | 6792                  | 14276       | 17048            | 5059             | 13403                 |
| 4950           | 6373                | 6463             | 11330                 | 9686        | 4090             | 1863             | 8839                  |
| 5319           | 9478                | 6621             | 12569                 | 8051        | 8453             | 4450             | 13091                 |
| 11753          | 17365               | 9855             | 29753                 | 8871        | 4153             | 2650             | 24387                 |
| 8816           | 10640               | 9297             | 5810                  | 5919        | 5268             | 2781             | 14911                 |
| 3601           | 12295               | 15754            | 9558                  | 4132        | 5229             | 13092            | 6714                  |
| 4623           | 5898                | 2416             | 10012                 | 29822       | 13267            | 1360             | 11432                 |
| 14331          | 6364                | 8974             | 12247                 | 9759        | 8702             | 1107             | 7042                  |
| 3477           | 26822               | 26687            | 4487                  | 12254       | 6550             | 2166             | 8005                  |
| 10509          | 18101               | 13251            | 11413                 | 10175       | 8515             | 3635             | 7039                  |
| 6237           | 15876               | 3005             | 24979                 | 4763        | 9959             | 5746             | 10338                 |
| 7240           | 13389               | 3677             | 26444                 | 20656       | 8809             | 12468            | 5008                  |
| 7500           | 33586               | 1610             | 20449                 | 5935        | 4552             | 7872             | 8225                  |
| 3569           | 10446               | 21888            | 11668                 | 8371        | 3501             | 2171             | 8509                  |
| 3443           | 12871               | 16131            | 9829                  | 11152       | 7595             | 4149             | 5992                  |

|       |       |       |       |       |       |       |       |
|-------|-------|-------|-------|-------|-------|-------|-------|
| 17505 | 6565  | 12798 | 22269 | 4376  | 10268 | 13666 | 8063  |
| 11009 | 10467 | 10002 | 7997  | 12687 | 6862  | 4572  | 9861  |
| 14142 | 5683  | 20026 | 21671 | 7365  | 5081  | 9826  | 11328 |
| 12541 | 14049 | 4944  | 4504  | 5930  | 12182 | 8787  | 11552 |
| 10120 | 17180 | 8411  | 10937 | 17596 | 7779  | 5460  | 13135 |
| 6846  | 7140  | 17666 | 14563 | 8740  | 6003  | 14653 | 9408  |
| 7556  | 13706 | 7391  | 14822 | 15900 | 5778  | 16330 | 5093  |
| 8475  | 14675 | 9217  | 19264 | 4593  | 18306 | 7051  | 12713 |
| 15018 | 18780 | 14439 | 39774 | 2451  | 13608 | 28750 | 7968  |
| 24729 | 9029  | 10800 | 12115 | 3554  | 17698 | 12822 | 4766  |
| 6180  | 9180  | 10289 | 9980  | 3791  | 2271  | 7980  | 5260  |
| 8662  | 7303  | 4240  | 10558 | 13315 | 8238  | 2636  | 8735  |
| 16450 | 17269 | 5030  | 10707 | 5436  | 6113  | 4535  | 12229 |
| 9587  | 5057  | 5329  | 7643  | 10356 | 3952  | 4568  | 7559  |
| 11228 | 14892 | 4067  | 18347 | 1700  | 8427  | 2574  | 13070 |
| 11317 | 11273 | 27835 | 10790 | 5436  | 5052  | 2969  | 12427 |
| 5662  | 3751  | 21257 | 9966  | 3554  | 11620 | 2219  | 15870 |
| 16028 | 6097  | 5817  | 10412 | 2462  | 6685  | 3242  | 8116  |
| 9972  | 7096  | 5579  | 11849 | 15179 | 5245  | 2159  | 13472 |
| 9829  | 14357 | 19417 | 11330 | 6384  | 5810  | 5537  | 6946  |
| 13112 | 5305  | 1497  | 7456  | 6338  |       | 20414 | 7951  |
| 14690 | 4870  | 5149  | 10368 | 10377 |       | 4421  | 19438 |
| 14599 | 6517  | 6111  | 8107  | 4391  |       | 9412  | 9825  |
| 3840  | 6081  | 9586  | 12417 | 9562  |       | 11953 | 5042  |
| 8961  | 10141 | 8745  | 16088 |       |       | 5431  | 8533  |
| 7528  | 14356 | 9156  | 18577 |       |       | 2471  | 24524 |
| 5024  | 10728 | 14895 | 25898 |       |       | 34529 |       |
| 10471 | 4837  | 10299 | 16529 |       |       |       |       |
| 4401  | 12326 | 10661 | 9265  |       |       |       |       |
| 9953  | 11511 | 3269  | 13413 |       |       |       |       |
|       | 8079  | 3960  | 7929  |       |       |       |       |
|       | 20982 | 6973  | 9668  |       |       |       |       |
|       | 9719  | 11519 | 10979 |       |       |       |       |
|       | 6663  | 6567  |       |       |       |       |       |
|       | 16067 | 3955  |       |       |       |       |       |
|       | 9929  |       |       |       |       |       |       |
|       | 26445 |       |       |       |       |       |       |
|       | 13543 |       |       |       |       |       |       |
|       | 13793 |       |       |       |       |       |       |
|       | 12121 |       |       |       |       |       |       |
|       | 13008 |       |       |       |       |       |       |
|       | 7982  |       |       |       |       |       |       |

**Supplementary Table S5.**

| Integrated Density of AuNPs |        |        |         |
|-----------------------------|--------|--------|---------|
| CAP30s Control              | CAP 0s | CAP 0s | CAP 30s |
| 540329                      | 172547 | 71657  | 81386   |
| 317286                      | 431535 | 52885  | 26174   |
| 366683                      | 78334  | 50113  | 83853   |
| 118864                      | 227289 | 98205  | 62198   |
| 389856                      | 182028 | 58882  | 113274  |
| 260748                      | 95261  | 213664 | 176140  |
| 255370                      | 67797  | 32246  | 90214   |
| 143714                      | 155367 | 84077  | 155663  |
| 254835                      | 143994 | 18060  | 167904  |
| 241522                      | 409060 | 130518 | 52593   |
| 173393                      | 91173  | 82556  | 22219   |
| 437882                      | 98606  | 20741  | 19181   |

|        |        |        |        |
|--------|--------|--------|--------|
| 301708 | 372871 | 42321  | 16830  |
| 283998 | 42174  | 50000  | 36912  |
| 529897 | 192966 | 22797  | 11897  |
| 132739 | 43429  | 32307  | 67489  |
| 325045 | 171486 | 111229 | 22481  |
| 256487 | 155863 | 165385 | 45392  |
| 225093 | 218957 | 243576 | 12669  |
| 459960 | 332020 | 115717 | 14759  |
| 242832 | 163495 | 32769  | 59857  |
| 102314 | 178575 | 134059 | 29691  |
| 274004 | 43099  | 91085  | 36894  |
| 319820 | 116779 | 96918  | 46448  |
| 144878 | 33679  | 42816  | 24724  |
| 313094 | 281964 | 92220  | 41174  |
| 215681 | 474462 | 163157 | 12320  |
| 426863 | 78871  | 107430 | 42693  |
| 169499 | 25139  | 78092  | 54199  |
| 449778 | 157231 | 44965  | 26720  |
| 207286 | 25451  | 46103  | 68806  |
| 600642 | 105195 | 99071  | 50186  |
| 191247 | 124412 | 169342 | 18736  |
| 175692 | 128267 | 80229  | 16030  |
| 167735 | 312896 | 36048  | 55855  |
| 195195 | 129867 | 76657  | 106951 |
| 195351 | 127963 | 117916 | 17979  |
| 131726 | 352128 | 22666  | 39283  |
| 328548 | 257630 | 66817  | 17452  |
| 212497 | 116701 | 53062  | 34551  |
| 453971 | 134485 | 35270  | 10871  |
| 318022 | 113204 | 33485  | 43176  |
| 335974 | 203686 | 37665  | 6543   |
| 135597 | 81301  | 39651  | 20391  |
| 226104 | 258075 | 18179  | 9906   |
| 136796 | 117997 | 56467  | 43154  |
| 168061 | 189202 | 26238  | 33298  |
| 530325 | 354143 | 16544  | 6978   |
| 310895 | 179360 | 42583  | 10313  |
| 156015 | 249807 | 10222  | 7391   |
| 118700 | 104282 | 19974  | 18762  |
| 122974 | 189066 | 53493  | 56664  |
| 133195 | 84785  | 27174  | 8288   |
| 267536 | 141462 | 21953  | 72528  |
| 200762 | 345977 | 148609 | 24130  |
| 299249 | 77114  | 73347  | 13301  |
| 94514  | 47361  | 62139  | 18333  |
| 293151 | 43665  | 54334  | 20520  |
| 176776 | 9389   | 4625   | 17705  |
|        | 270307 | 6653   | 38519  |
|        | 31190  | 46708  | 28687  |
|        | 257884 | 50733  | 15938  |
|        | 155736 | 49224  |        |
|        | 345060 | 17503  |        |
|        | 43585  | 15541  |        |
|        | 81386  | 3876   |        |
|        | 23622  |        |        |
|        | 75993  |        |        |
|        | 65180  |        |        |
|        | 568575 |        |        |
|        | 318601 |        |        |
|        | 174400 |        |        |

|  |        |  |  |
|--|--------|--|--|
|  | 52373  |  |  |
|  | 23718  |  |  |
|  | 59279  |  |  |
|  | 38939  |  |  |
|  | 75419  |  |  |
|  | 98606  |  |  |
|  | 24077  |  |  |
|  | 75776  |  |  |
|  | 41710  |  |  |
|  | 22592  |  |  |
|  | 70125  |  |  |
|  | 45832  |  |  |
|  | 98998  |  |  |
|  | 114681 |  |  |
|  | 126842 |  |  |
|  | 72896  |  |  |
|  | 161663 |  |  |
